# Supplementary material for: Enhanced catalytic activity of Au nanoparticles self-assembled on thiophenol functionalized graphene
Source: Royal Society of Chemistry journal article supplement (doi:10.1039/c4cy01620c), 2015-01-01
Supplement: c4cy01620c1.pdf [file c4cy01620c1.pdf]

Electronic Supplementary Information

## Enhanced Catalytic Activity of Gold Nanoparticles on Thiophenol-Functionalized Graphene

Ren Ren, Shuwen Li, Jing Li, Jianxin Ma, Hengzhi Liu and Jiantai Ma.\*

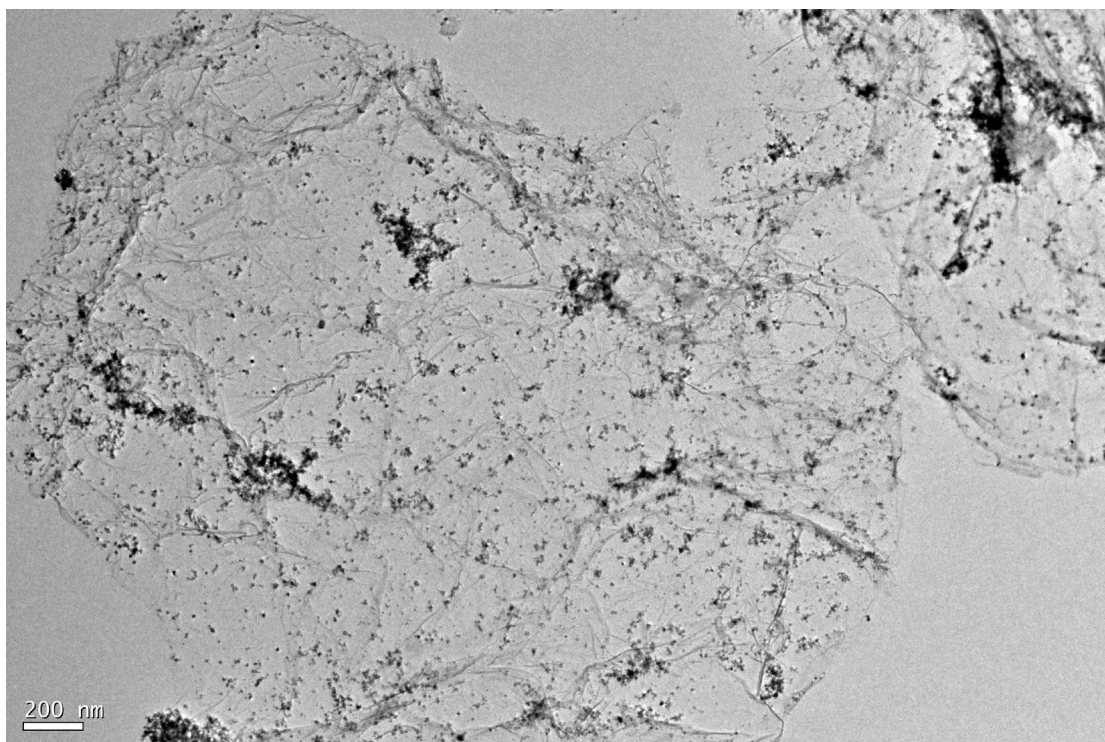

**Fig. S1** Typical TEM image of Au/GS

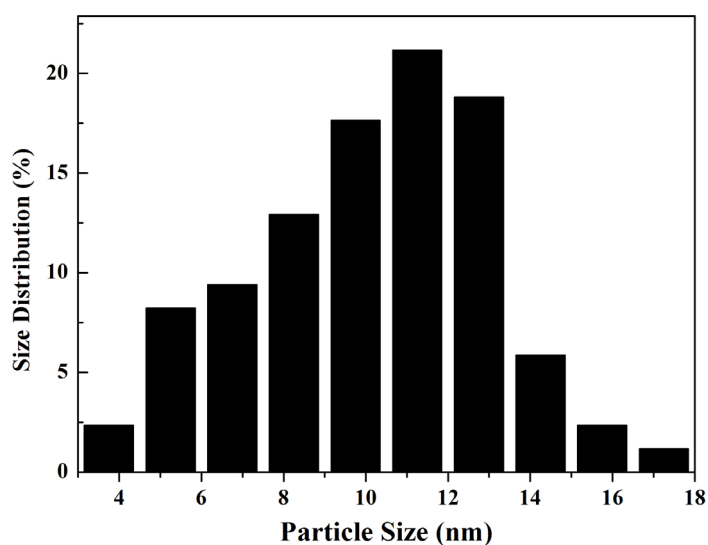

**Fig. S2** Size distribution histograms of Fig. S1

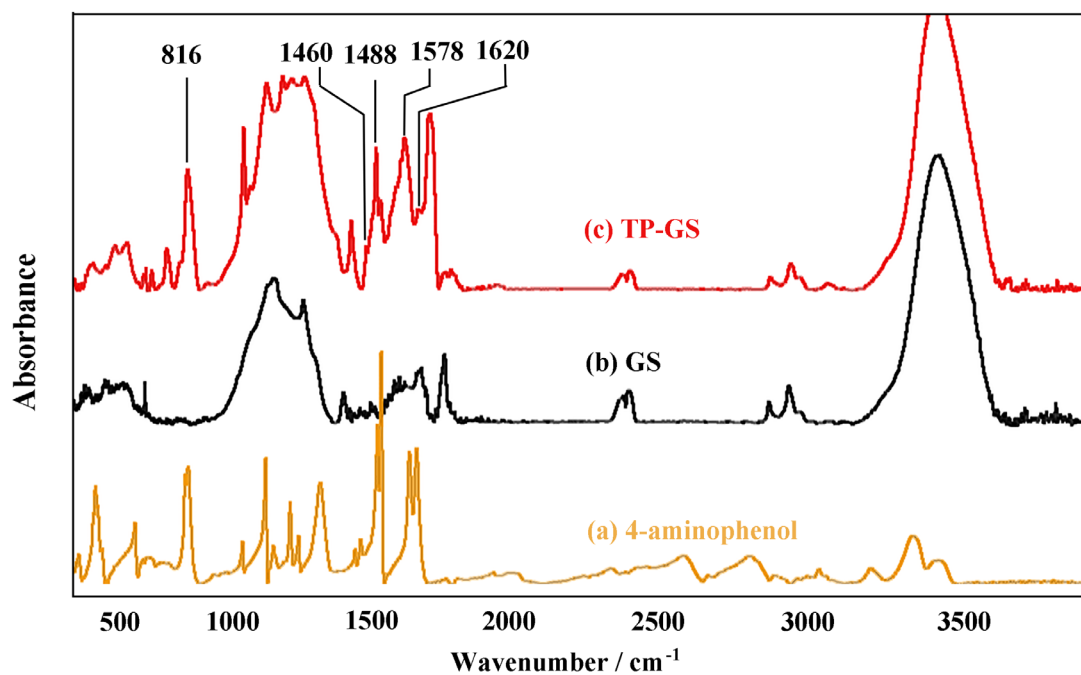

**Fig. S3** FT-IR spectrum of (a) 4-aminophenol, (b) GS and (c) TP-GS.

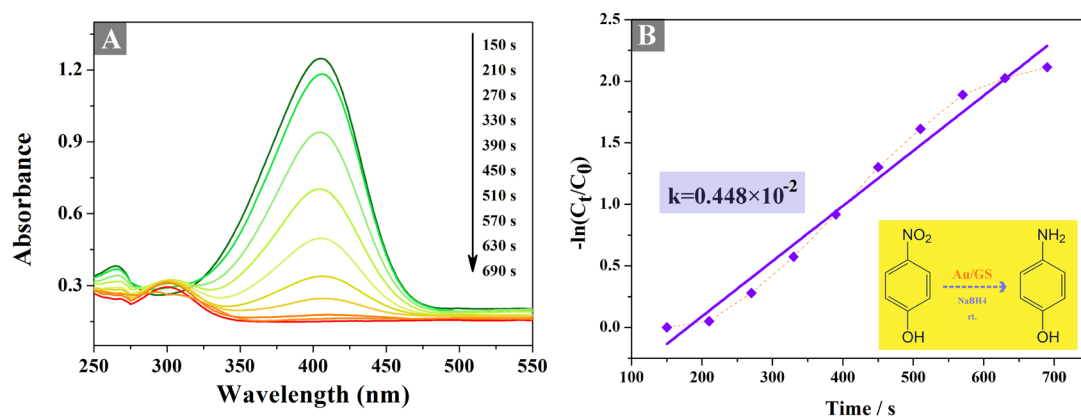

**Fig. S4** (A) Representative time dependent UV–Vis absorption spectra for the reduction of 4-NP on Au/TP-GS in water at 25°C. (B) Plot of  $-\ln(C_t/C_0)$  versus time spectra for the reduction of 4-NP on Au/TP-GS.
